# Supplementary material for: Between darkness and light: spring habitats provide new perspectives for modern researchers on groundwater biology
Source: PeerJ. 2021 Jul 26;9:e11711. doi: 10.7717/peerj.11711 (PMC8320523; doi:10.7717/peerj.11711)
Supplement: Supplemental Information 1 [file peerj-09-11711-s001.xlsx]

## Sheet: Foglio1
Reference	Year of pubblication	Area	Key words used for research	Taxon/Taxa	Number of species treated	Stygofauna found in springs	Number of stygofaunal species in springs	Surface fauna found underground	Number of surface species found underground	Species found both in caves and springs	Number of species in both	Ecology	Taxonomy	Behaviour	Conservation	Fauna assessment	Phylogeny	Pollution	Predator	Type of foraging	Notes
(Abrams et al. 2012)	2012	Australia	Groundwater fauna	Parabathynellidae	32	1	NA	0	0	1	NA	0	1	0	0	0	1	0	0	NA	Confusional phylogeny
(Abrams et al. 2013)	2013	Australia	Groundwater fauna	Parabathynellidae	34	1	NA	0	0	1	NA	0	1	0	0	0	1	0	0	NA	NA
(Achurra and Rodriguez 2008)	2008	Iberian Pensinsula	Groundwater fauna	Oligochaete	NA	1	NA	1	NA	1	NA	1	1	0	1	1	0	0	0	NA	47 taxa treated, 37 identified to species level
(Achurra and Rodriguez 2016)	2016	France	Groundwater fauna	Tubificidae	2	0	0	0	0	0	0	1	1	0	0	0	0	0	0	Selective feeding on mineral particles	NA
(Achurra et al. 2015a)	2015	Spain	Groundwater fauna	Lumbriculidae	2	0	0	0	0	0	0	0	1	0	0	0	1	0	0		Cryptic species, 12 taxa treated including sp.
(Achurra et al. 2015b)	2015	Spain	Groundwater fauna	Oligochaete	62	NA	NA	1	NA	1	NA	1	1	0	0	1	0	0	0
(Allford et al. 2008)	2008	Australia	Groundwater fauna	Arthropoda, Oligochaeta	NA	0	0	0	0	0	0	0	0	0	0	0	0	0	0		8 taxa sampled / The article talks about the efficiency of stygofauna's sampling methods
(Apostolov 2005)	2005	France	Groundwater fauna	Harpacticoida	2	0	0	0	0	0	0	0	1	0	0	0	0	0	0
(Asmyhr and Cooper 2012)	2012	Australia	Groundwater fauna	Crustacea	NA	0	0	0	0	0	0	0	1	0	0	0	1	0	0
(Asmyhr et al. 2014a)	2014	Australia	Groundwater fauna	Parabathynellidae	NA	NA	NA	0	0	NA	NA	0	1	0	0	0	1	0	0		Number of individuals sampled variable from one borehole to the other
(Asmyhr et al. 2014b)	2014	Australia	Groundwater fauna	Crustacea	NA	NA	NA	0	0	NA	NA	0	0	0	1	1	1	0	0		Other taxa were sampled, but the study focuses only on Crustacea
(Asmyhr et al. 2012)	2012	Australia	Groundwater fauna	Parabathynellidae	NA	NA	NA	0	0	NA	NA	0	0	0	1	0	0	0	0
(Avramov et al. 2013a)	2013	Germany	Groundwater fauna	Amphipoda	2	0	0	0	0	0	0	0	0	1	0	0	0	0	0
(Avramov et al. 2013b)	2013	Germany	Groundwater fauna	Amphipoda	1	0	0	0	0	0	0	0	0	0	0	0	0	1	0
(Baltanas et al. 2000)	2000	Europe, Japan	Groundwater fauna	Ostracoda	1	0	0	0	0	0	0	1	1	0	0	0	1	0	0
(Baratti et al. 2004)	2004	Morocco	Groundwater fauna	Isopoda	NA	NA	NA	0	0	NA	NA	0	1	0	0	0	1	0	0		3 species identified plus other taxa not identified
(Bednar et al. 2017)	2017	Austria	Groundwater fauna	Arthropoda, Mollusca	NA	1	NA	0	0	1	NA	1	0	0	0	1	0	0	0		50 macroinvertebrates taxa sampled, including Niphargus sp. found in spring at a single location
(Beladjal et al. 1992)	1992		Groundwater fauna	Cladocera																	Not found
(Berkhoff et al. 2009)	2009	Germany	Groundwater fauna																		It's in german
(Berrady et al. 2000)	2000	Morocco	Groundwater fauna																		Article requested
(Bis et al. 2000)	2000	Poland	Groundwater fauna	Anellida, Arthropoda, Mollusca	NA	0	0	0	0	0	0	1	0	0	0	1	0	0	0
(Bork et al. 2009)	2009	South Korea	Groundwater fauna	Arthropoda, Rotatoria, Oligochaeta, Tardigrada, Nematoda	NA	0	0	0	0	0	0	1	0	0	0	1	0	0	0
(Bork et al. 2008)	2008	South Korea	Groundwater fauna	Arthropoda, Rotatoria, Oligochaeta, Nematoda	NA	0	0	0	0	0	0	0	0	0	0	1	0	0	0
(Bottazzi et al. 2011)	2011	Italy	Groundwater fauna	Arthropoda, Mollusca, Nematoda, Anellida	NA	1	5	0	0	0	0	1	0	0	0	1	0	0	0		54 taxa of invertebrates sampled
(Boughrous et al. 2007a)	2007		Groundwater fauna																		Article requested
(Boughrous et al. 2007b)	2007	Morocco	Groundwater fauna	Gastropoda, Isopoda, Ostracoda, Amphipoda	28	0	0	1	NA	0	0	1	0	0	0	1	0	0	0
(Boukhoubza et al. 2008)	2008		Groundwater fauna																		Article requested
(Boulton et al. 2004)	2004	France	Groundwater fauna	Arthropoda, Nematoda, Oligochaeta	NA	0	0	0	0	0	0	0	0	0	0	0	0	0	0		The article talks about stygofauna's sampling methods
(Boutin 1994)	1994	Canary Islands	Groundwater fauna	NA	NA	0	0	0	0	0	0	1	0	0	0	1	0	0	0		The article talks about the relation between geology and stygofauna
(Bozkurt 2019)	2019	Turkey	Groundwater fauna	Copepoda, Rotatoria, Cladocera	24	0	0	0	0	0	0	0	0	0	0	1	0	0	0
(Bradford et al. 2010)	2010	Australia	Groundwater fauna	Amphipoda, Copepoda, Oligochaeta, Dytiscidae	NA	0	0	1		0	0	0	1	0	0	0	1	0	0		6254 stygobitic macroinvertebrate specimens collected / Terrestrial's taxa sampled (fallen by accident into the aquifer) included Acari, Collembola, Chilopoda and insect larvae
(Bradford et al. 2013)	2013	Australia	Groundwater fauna	Amphipoda	3	0	0	0	0	0	0	0	0	0	0	0	1	0	0
(Brancelj 2015)	2015	Chad	Groundwater fauna	Copepoda	3	1	1	0	0	NA	NA	0	1	0	0	0	0	0	0		Pilocampus schroederi found in spring
(Brancelj et al. 2013)	2013	Southeast Asia	Groundwater fauna	Arthropoda, Nematoda, Pisces, Turbellaria	122	1	6	0	0	1	1	0	0	0	0	1	0	0	0		S. monardi sarangensis, Halicyclops thermophilus, Stenasellus brignolii, Candonopsis putealis and Fierscyclops solaris were found only in springs, C. filipinica both in caves and springs
(Brancelj and Dumont 2007)	2007	World	Groundwater fauna	Calanoida, Cladocera	20	1	4	0	0	1	4	1	0	0	0	0	0	0	0		Alona smirnovi, Alona protzi, Pleuroxus pigroides and Macrothrix bialatus were found in springs / The informations for the article have been taken from various studies around the world
(Brancelj et al. 2016)	2016	Slovenia	Groundwater fauna	Arthropoda, Nematoda, Oligochaeta, Rotatoria, Tardigrada, Bryozoa, Gastropoda	NA	0	0	0	0	0	0	0	0	0	0	1	0	0	0		At least 23 stygobites' taxa collected
(Brown et al. 2015)	2015	Australia	Groundwater fauna	Oligochaeta	48	0	0	0	0	0	0	0	1	0	0	0	1	0	0
(Bruce 2008)	2008	Australia	Groundwater fauna	Isopoda	2	NA	NA	0	0	NA	NA	0	1	0	0	0	0	0	0
(Brunke and Gonser 1999)	1999	Switzerland	Groundwater fauna																		Not found
(Bruno et al. 2005)	2005	Florida	Groundwater fauna	Copepoda	NA	0	0	0	0	0	0	0	1	0	0	0	0	0	0		65 taxa treated
(Bruyere et al. 1993)	1993		Groundwater fauna																		Not found
(Buhay and Crandall 2005)	2005	USA	Groundwater fauna	Malacostraca	3	0	0	0	0	0	0	0	0	0	0	0	1	0	0
(Camacho et al. 2017)	2017	Spain	Groundwater fauna	Bathynellacea	92	1	NA	0	0	1	NA	0	0	0	0	1	0	0	0		Taxa's informations collected from various studies performed around the world
(Camacho et al. 2012)	2012	Iberian Pensinsula	Groundwater fauna	Bathynellacea	NA	0	0	0	0	0	0	0	0	0	0	0	1	0	0		Cryptic species treated
(Camacho et al. 2013)	2013	Spain	Groundwater fauna	Bathynellidae	2	0	0	0	0	0	0	0	1	0	0	0	1	0	0
(Camacho et al. 2014)	2014	Iberian Peninsula, Balearic Islands	Groundwater fauna	Bathynellacea	58	1	31	0	0	1	31	1	0	0	0	1	0	0	0		Iberobathynella's species found in all habitats, Paradoxiclamousella's species found in caves, springs and interstitial river banks
(Camacho and Hancock 2011)	2011	Australia	Groundwater fauna	Parabathynellidae	2	0	0	0	0	0	0	0	1	0	0	0	0	0	0
(Camacho and Hancock 2012)	2012	Australia	Groundwater fauna	Parabathynellidae	3	0	0	0	0	0	0	0	1	0	0	0	0	0	0
(Camacho et al. 2018a)	2018	Texas	Groundwater fauna	Bathynellidae	15	1	NA	0	0	1	NA	0	1	0	0	0	1	0	0
(Camacho et al. 2018b)	2018	World	Groundwater fauna	Bathynellidae	103	1	NA	0	0	1	NA	0	0	0	0	1	1	0	0		Informations taken from studies performed worldwide
(Camacho et al. 2018c)	2018	Asia	Groundwater fauna	Parabathynellidae	74	0	0	0	0	0	0	0	1	0	0	1	1	0	0
(Camacho et al. 2016)	2016	Alaska	Groundwater fauna	Bathynellacea	1	0	0	0	0	0	0	0	1	0	0	0	0	0	0
(Camacho et al. 2009)	2009	Montana	Groundwater fauna	Bathynellacea	3	0	0	0	0	0	0	0	1	0	0	0	0	0	0
(Camacho et al. 2006)	2006	Spain	Groundwater fauna	Parabathynellidae	5	0	0	0	0	0	0	0	0	0	0	0	1	0	0
(Chatelliers et al. 2009)	2009	France, Belgium	Groundwater fauna	Oligochaeta	143	0	0	0	0	0	0	1	0	0	0	1	0	0	0
(Christian and Spotl 2010)	2010	Austria	Groundwater fauna	Mollusca, Arthropoda, Anellida, Nematoda, Turbellaria	NA	1	NA	1	NA	1	NA	1	0	0	0	1	0	0	0		Assessment of the caves' fauna of Austria
(Claret et al. 1999a)	1999	France	Groundwater fauna	Mollusca, Arthropoda, Anellida, Nematoda, Planaria, Tardigrada	NA	0	0	0	0	0	0	1	0	0	0	1	0	0	0
(Claret et al. 1999b)	1999	France, Arizona, Montana	Groundwater fauna	Invertebrates	NA	0	0	0	0	0	0	1	0	0	0	1	0	0	0
(Clements et al. 2016)	2016	Australia	Groundwater fauna	Arthropoda, Oligochaeta, Platyhelminthes	NA	1	NA	0	0	0	0	1	0	0	1	1	0	0	0
(Cook et al. 2012)	2012	Australia	Groundwater fauna	Bathynellacea	NA	0	0	0	0	0	0	0	0	0	0	0	1	0	0
(Cottarelli et al. 2008)	2008	Italy	Groundwater fauna	Copepoda	2																Article requested
(Cottarelli et al. 2012)	2012	Italy	Groundwater fauna	Copepoda	3	0	0	0	0	0	0	0	1	0	0	0	0	0	0
(Culver et al. 2012)	2012		Groundwater fauna																		Article requested
(Culver and Pipan 2011)	2011	Croatia, Slovenia, Austria	Groundwater fauna	Amphipoda, Isopoda, Rotatoria, Copepoda, Mollusca	58	1	7	0	0	0	0	1	0	0	0	0	0	0	0
(Curcic 2008)	2008	Israel	Groundwater fauna	Pseudoscorpionida	1	0	0	0	0	0	0	0	1	0	0	0	0	0	0
(Danielopol 1989)	1989		Groundwater fauna																		Article requested
(Danielopol and Pospisil 2001)	2001	Austria	Groundwater fauna	Isopoda, Amphipoda, Copepoda, Anellida, Mollusca, Rotatoria, Nematoda	35	0	0	0	0	0	0	0	0	0	0	1	0	0	0
(Danielopol and Pospisil 2002)	2002	Austria	Groundwater fauna	Copepoda																	Article requested
(Danielopol et al. 2002)	2002	France	Groundwater fauna	Copepoda																	Article requested
(Danks and Williams 1991)	1991	Canada	Groundwater fauna	Arthropoda																	Not found
(Darocha and Hakenkamp 1993)	1993	USA	Groundwater fauna	Copepoda	2	0	0	0	0	0	0	0	1	0	0	0	0	0	0
(Di Lorenzo et al. 2015)	2015	Italy	Groundwater fauna	Copepoda	NA	0	0	0	0	0	0	0	0	0	0	0	0	1	0
(Di Lorenzo et al. 2018)	2018	Italy	Groundwater fauna	Copepoda	NA	1	NA	0	0	0	0	0	0	0	0	0	0	0	0
(Di Lorenzo et al. 2019)	2019	Italy	Groundwater fauna	Amphipoda, Isopoda, Ostracoda, Oligochaeta, Decapoda	22	NA	NA	NA	NA	NA	NA	0	0	0	0	0	0	1	0		Informations taken from other studies
(Di Lorenzo and Galassi 2013)	2013	Italy	Groundwater fauna	Copepoda	12	0	0	1	NA	0	0	1	0	0	0	0	0	1	0		Other taxa sampled but the study focuses only on Copepoda
(Di Lorenzo and Galassi 2017)	2017	Italy	Groundwater fauna	Copepoda	1	0	0	0	0	0	0	1	0	0	0	0	0	0	0	NA	NA
(Dole-Olivier 1998)	1998	France	Groundwater fauna	Arthropoda, Oligochaeta, Planaria, Nematoda, Rotatoria, Hydridae	NA	0	0	0	0	0	0	0	0	0	0	1	0	0	0	NA	168 taxa sampled, including 27 stygobites species
(Dole-Olivier et al. 2009a)	2009	Europe	Groundwater fauna	Crustacea, Mollusca, Hirudinea	313	0	0	NA	NA	0	0	0	0	0	0	1	0	0	0	NA	NA
(Dole-Olivier et al. 2015)	2015	France	Groundwater fauna	Anellida, Arthropoda, Mollusca	44	1	18	1	NA	0	0	0	0	0	0	1	0	0	0	NA	NA
(Dole-Olivier et al. 2014)	2014	Europe, North America	Groundwater fauna	NA	514	1	NA	0	0	0	0	0	0	0	0	1	1	0	0	NA	NA
(Dole-Olivier et al. 2005)	2005	Europe	Groundwater fauna	Invertebrates	1262	0	0	0	0	0	0	1	1	0	1	1	0	0	0	NA	NA
(Dole-Olivier et al. 2009b)	2009	France	Groundwater fauna	Crustacea, Oligochaeta, Mollusca, Coleoptera	62	0	0	0	0	0	0	1	0	0	0	1	0	0	0	NA	NA
(Doleolivier and Marmonier 1992b)	1992	France	Groundwater fauna	Invertebrates	NA	0	0	0	0	0	0	1	0	0	0	1	0	0	0	NA	NA
(Doleolivier and Marmonier 1992a)	1992	France	Groundwater fauna	Crustacea, Hexapoda	NA	0	0	0	0	0	0	1	0	0	0	0	0	0	0	NA	Other taxa sampled but the study focuses only on Crustacea and Hexapoda / 73 taxa collected, 17 taken into consideration
(Dumas 2002)	2002	France	Groundwater fauna	Amphipoda, Cyclopoida, Isopoda	24	0	0	1	9	0	0	0	0	0	0	1	0	0	0	NA	NA
(Dumas 2004)	2004	France	Groundwater fauna	Amphipoda, Cyclopoida, Isopoda	20	0	0	1	8	0	0	0	0	0	0	1	0	0	0	NA	NA
(Dumas et al. 2001)	2001	France	Groundwater fauna	Amphipoda, Isopoda	10	0	0	0	0	0	0	0	0	0	0	1	0	0	0	NA	NA
(Dumas and Fontanini 2001)	2001	NA	Groundwater fauna	NA	NA	NA	NA	NA	NA	NA	NA	NA	NA	NA	NA	NA	NA	NA	NA	NA	Not available
(Dumnicka et al. 2017)	2017	Poland	Groundwater fauna	Arthropoda, Mollusca, Oligochaeta	NA	0	0	0	0	0	0	0	0	0	0	1	0	0	0	NA	Some taxa were identified to family level, some to species level
(Dumont and Negrea 1996)	1996	World	Groundwater fauna	Cladocera	94	NA	NA	NA	NA	NA	NA	NA	NA	NA	NA	NA	NA	NA	NA	NA	Not available
(Durkota et al. 2019)	2019	NA	Groundwater fauna	NA	NA	NA	NA	NA	NA	NA	NA	NA	NA	NA	NA	NA	NA	NA	NA	NA	Article requested
(Eberhard et al. 2009)	2009	Australia	Groundwater fauna	Arthropoda, Anellida, Rotifera, Gastropoda, Platyhelminthes	93	0	0	0	0	0	0	0	0	0	0	1	0	0	0	NA	NA
(Eisendle-Flockner and Hilberg 2015)	2015	Europe	Groundwater fauna	Nematoda	76	0	0	0	0	0	0	1	0	0	0	0	0	0	0	NA	NA
(El Adnani et al. 2007)	2007	Morocco	Groundwater fauna	NA	NA	NA	NA	NA	NA	NA	NA	NA	NA	NA	NA	NA	NA	NA	NA	NA	Digital copy not available
(Engel 2007)	2007	Italy, Romania, Mexico, Wyoming	Groundwater fauna	Invertebrates, Osteichthyes, Anguilliformes	NA	0	0	1	NA	0	NA	1	0	0	0	1	0	0	1	NA	NA
(Ercoli et al. 2019)	2019	France	Groundwater fauna	Isopoda, Amphipoda	3	1	NA	0	0	1	NA	1	0	0	0	0	0	0	1	NA	NA
(Erseus 1992)	1992	Canary Islands	Groundwater fauna	Tubificidae	7	0	0	0	0	0	0	0	1	0	0	0	0	0	0	NA	NA
(Fenolio et al. 2017)	2017	Florida, Georgia	Groundwater fauna	Cambaridae, Isopoda, Urodela	4	1	NA	0	0	1	NA	0	1	0	0	0	0	0	1	NA	The study focuses on Cambarus cryptodytes but cites isopods of the Caecidotea genus and salamanders of the Eurycea genus saying that they are tipically found both in springs and caves
(Fenwick 2001)	2001	New Zealand	Groundwater fauna	Amphipoda	21	0	0	0	0	0	0	0	1	0	0	0	0	0	0	NA	NA
(Ferreira et al. 2007)	2007	France	Groundwater fauna	Invertebrates	380	0	0	0	0	0	0	0	0	0	0	1	0	0	0	NA	NA
(Finston et al. 2009)	2009	Australia	Groundwater fauna	Isopoda, Amphipoda	NA	0	0	0	0	0	0	0	0	0	0	0	1	0	0	NA	NA
(Finston et al. 2010)	2010	Australia	Groundwater fauna	Amphipoda	1	0	0	0	0	0	0	0	0	0	0	0	0	0	0	NA	Use of polymorphic microsatellite loci to assess variability in Chydaekata sp.
(Fiser et al. 2018a)	2018	Switzerland	Groundwater fauna	Niphargidae	24	1	2	0	0	1	NA	0	1	0	0	0	0	0	0	NA	NA
(Fiser et al. 2018b)	2018	Belgium	Groundwater fauna	Niphargidae	9	1	NA	0	0	1	NA	0	1	0	1	0	1	0	0	NA	NA
(Foulquier et al. 2008)	2008	France	Groundwater fauna	Niphargidae	1	1	1	0	0	1	1	0	0	0	0	0	0	0	0	NA	The imprint of Quaternary glaciers on the present-day distribution of Niphargus virei
(Foulquier et al. 2010)	2010	Europe	Groundwater fauna	Amphipoda	1	0	0	0	0	0	0	1	0	0	0	0	0	0	0	Opportunistic feeder	Niphargus rhenorhodanensis
(Fowler and Scarsbrook 2002)	2002	New Zealand	Groundwater fauna	Arthropoda, Mollusca, Oligochaeta	NA	0	0	0	0	0	0	0	0	0	0	1	0	0	0	NA	22 taxa collected
(Fraser and Williams 1998)	1998	Canada	Groundwater fauna	Oligochaeta, Arthropoda	NA	0	0	0	0	0	0	1	0	0	0	1	0	0	0	NA	28 taxa sampled
(Gabrovsek et al. 2011)	2011	Slovenia	Groundwater fauna	Copepoda	31	0	0	0	0	0	0	0	0	0	1	1	0	0	0	NA	Environmental management
(Galassi 2001)	2001	Europe	Groundwater fauna	Copepoda	951	NA	NA	0	0	NA	NA	1	0	0	0	1	1	0	0	NA	Nitocrella pescei found near the opening of a spring
(Galassi et al. 2009)	2009	Europe, North America, Australia	Groundwater fauna	Copepoda	1000	NA	NA	NA	NA	NA	NA	0	0	0	1	1	1	0	0	NA	NA
(Galassi et al. 2014)	2014	Italy	Groundwater fauna	Copepoda	22	1	NA	1	NA	1	NA	1	0	0	0	1	0	0	0	NA	"Stygobites are frequently found in spring habitats where they can temporarily survive after being drifted from their original groundwater habitats"
(Galassi et al. 2013)	2013	Europe	Groundwater fauna	Copepoda	94	0	0	0	0	0	0	1	0	0	0	1	0	0	0	NA	NA
(Garman et al. 2011)	2011	Florida	Groundwater fauna	Invertebrates, Archaea, Prokaryota	NA	0	0	0	0	0	0	1	0	0	0	1	0	0	0	NA	Stygobites found in cave passages feeding an inactive spring
(Gerecke et al. 2018)	2018	Europe	Groundwater fauna	Hydrachnidia	970	NA	NA	NA	NA	NA	NA	1	0	0	0	1	0	0	0	NA	The article doesn't specify if the species are stygobites or not, but taxa were sampled both in springs and caves
(Ghlala et al. 2009)	2009	NA	Groundwater fauna	Isopoda	NA	NA	NA	NA	NA	NA	NA	NA	NA	NA	NA	NA	NA	NA	NA	NA	Article requested
(Giani et al. 2001)	2001	Europe	Groundwater fauna	Oligochaeta	150	NA	NA	NA	NA	NA	NA	1	0	0	0	1	0	0	0	NA	The article doesn't specify which species are stygobites
(Gibert et al. 2009)	2009	USA, Europe	Groundwater fauna	Invertebrates, Proteus	NA	NA	NA	1	NA	NA	NA	0	0	0	1	1	0	0	0	NA	The article doesn't specify the habitats of sampling
(Gibert et al. 1995)	1995	France	Groundwater fauna	Oligochaeta, Nematoda, Gastropoda, Cyclopoida, Chironomidae	NA	0	0	0	0	0	0	1	0	0	0	1	0	0	0	NA	NA
(Gibson et al. 2019)	2019	Australia	Groundwater fauna	NA	4000	0	0	0	0	0	0	0	0	0	0	0	0	0	0	NA	It talks about a transdisciplinary research approach to better study subterranean fauna
(Glasstetter 2012)	2012	Switzerland	Groundwater fauna	Lumbricidae	NA	NA	NA	NA	NA	NA	NA	NA	NA	NA	NA	NA	NA	NA	NA	NA	Not found
(Goricki et al. 2017)	2017	Europe	Groundwater fauna	Proteus anguinus	1	1	1	0	0	1	1	1	1	0	0	0	0	0	0	NA	The specimens found in springs could be emerged during seasonal flooding
(Gossel et al. 2007)	2007	World	Groundwater fauna	NA	NA	NA	NA	NA	NA	NA	NA	NA	NA	NA	NA	NA	NA	NA	NA	NA	It's in german
(Gottstein et al. 2007)	2007	Kornati Islands (Croatia)	Groundwater fauna	Crustacea	NA	0	0	0	0	0	0	1	0	0	0	1	0	0	0	NA	33 taxa treated
(Graillot et al. 2014)	2014	France	Groundwater fauna	Crustacea, Gastropoda	9	0	0	0	0	0	0	1	0	0	0	0	0	0	0	NA	NA
(Graymore et al. 2001)	2001	World	Groundwater fauna	Phytoplankton, Periphyton, Macrophytes, Invertebrates, Fishes	NA	0	0	0	0	0	0	0	0	0	0	0	0	1	0	NA	Impacts of atrazine on acquatic ecosystems
(Griebler et al. 2016)	2016	Europe	Groundwater fauna	Bacteria, Invertebrates	NA	0	0	0	0	0	0	0	0	0	0	0	0	1	0	NA	Impacts of geothermal energy use and storage of heat on groundwater
(Griebler et al. 2018)	2018	Germany	Groundwater fauna	NA	NA	NA	NA	NA	NA	NA	NA	NA	NA	NA	NA	NA	NA	NA	NA	NA	It's in german
(Griebler et al. 2014)	2014	World	Groundwater fauna	Bacteria, A. mexicanus, G. minus, Sinocyclocheilus, A. aquaticus	NA	0	0	0	0	0	0	1	0	0	1	0	1	0	0	NA	NA
(Griebler et al. 2010)	2010	Germany	Groundwater fauna	Invertebrates, Bacteria	NA	0	0	0	0	0	0	1	0	0	0	0	0	0	0	NA	32 invertebrates taxa treated
(Gunn et al. 2000)	2000	England	Groundwater fauna	Invertebrates	NA	1	NA	0	0	1	NA	1	0	0	1	0	0	0	0	NA	50 taxa from the surface, 28 from subterranean habitats / Only 8 taxa found in caves were not recorded from stream sinks or springs
(Gutjahr et al. 2013a)	2013	Germany	Groundwater fauna	NA	NA	NA	NA	NA	NA	NA	NA	NA	NA	NA	NA	NA	NA	NA	NA	NA	It's in german
(Gutjahr et al. 2013b)	2013	Germany	Groundwater fauna	Nematoda, Crustacea, Oligochaeta, Polychaeta	107	0	0	0	0	0	0	0	0	0	0	0	0	0	0	NA	Sampling efficiency in groundwater
(Guy-Haim et al. 2018)	2018	Israel, Italy, Libya	Groundwater fauna	Typhlocaris	4	1	1	0	0	0	0	0	0	0	0	0	1	0	0	NA	T. galilea collected in spring
(Guzik et al. 2010)	2010	Australia	Groundwater fauna	Invertebrates	4140	0	0	0	0	0	0	0	0	0	0	1	0	0	0	NA	NA
(Guzik et al. 2011)	2011	Australia	Groundwater fauna	Amphipoda, Isopoda, Dytiscidae	NA	0	0	0	0	0	0	0	0	0	0	0	1	0	0	NA	3 species of diving beetles and 1 amphipod treated, plus a lineage of isopods
(Guzik et al. 2019)	2019	Australia	Groundwater fauna	Isopoda	26	1	NA	NA	NA	1	NA	0	0	0	0	0	1	0	0	NA	The article is not available but in the introduction it says that some species can be found both in springs and subterranean habitats
(Hahn 2006)	2006	Germany	Groundwater fauna	Bacteria, Crustacea	35	0	0	0	0	0	0	1	0	0	0	1	0	0	0	NA	NA
(Hahn and Fuchs 2009)	2009	Germany	Groundwater fauna	Invertebrates	NA	0	0	0	0	0	0	1	0	0	0	1	0	0	0	NA	105 taxa sampled including 60 stygobionts
(Hahn and Gutjahr 2014)	2014	NA	Groundwater fauna	NA	NA	NA	NA	NA	NA	NA	NA	NA	NA	NA	NA	NA	NA	NA	NA	NA	It's in german
(Hahn and Matzke 2005)	2005	Germany	Groundwater fauna	Invertebrates	NA	0	0	0	0	0	0	1	0	0	0	1	0	0	0	NA	NA
(Hahn 2005)	2005	Germany, South Korea	Groundwater fauna	Bacteria, Invertebrates	NA	1	NA	0	0	NA	NA	0	0	0	0	0	0	0	0	NA	New method for sampling stygofauna
(Hahn 2003)	2003	NA	Groundwater fauna	NA	NA	NA	NA	NA	NA	NA	NA	NA	NA	NA	NA	NA	NA	NA	NA	NA	It's in german
(Hallam et al. 2008)	2008	Morocco	Groundwater fauna	NA	NA	NA	NA	NA	NA	NA	NA	NA	NA	NA	NA	NA	NA	NA	NA	NA	Article requested
(Hancock and Boulton 2008)	2008	Australia	Groundwater fauna	Invertebrates	NA	0	0	0	0	0	0	1	0	0	0	1	0	0	0	NA	87 taxa collected
(Hancock and Boulton 2009)	2009	Australia	Groundwater fauna	Arthropoda, Nematoda, Oligochaeta, Tardigrada, Microturbellaria	NA	0	0	1	NA	0	0	0	0	0	0	1	0	0	0	NA	NA
(Hancock et al. 2005)	2005	Australia	Groundwater fauna	Invertebrates, Fishes	NA	0	0	0	0	0	0	1	0	0	0	0	0	0	1	Generalist predators	NA
(Harvey et al. 2011)	2011	Australia	Groundwater fauna	Schizomida, Pachybolidae, Camaenidae	49	0	0	0	0	0	0	1	0	0	1	0	0	0	0	NA	NA
(Hilberg and Eisendle-Flockner 2016)	2016	Austria	Groundwater fauna	Crustacea, Nematoda	NA	1	NA	0	NA	NA	0	1	0	0	0	1	0	0	0	NA	NA
(Hof et al. 2008)	2008	Europe	Groundwater fauna	NA	14 020	NA	NA	NA	NA	NA	NA	1	0	0	0	1	0	0	0	NA	Data extracted from "Limnofauna Europaea" (Illies, 1978)
(Holsinger 1993)	1993	NA	Groundwater fauna	NA	NA	NA	NA	NA	NA	NA	NA	NA	NA	NA	NA	NA	NA	NA	NA	NA	Not found
(Hose 2005)	2005	NA	Groundwater fauna	NA	NA	NA	NA	NA	NA	NA	NA	NA	NA	NA	NA	NA	NA	NA	NA	NA	Article requested
(Hose et al. 2017)	2017	Australia	Groundwater fauna	Invertebrates	NA	0	0	0	0	0	0	1	0	0	0	1	0	0	0	NA	NA
(Hose et al. 2016)	2016	Australia	Groundwater fauna	Cyclopoida, Harpacticoida	3	0	0	0	0	0	0	0	0	0	0	0	0	1	0	NA	NA
(Huebner and Vinson 2004)	2004	Utah	Groundwater fauna	NA	NA	NA	NA	NA	NA	NA	NA	NA	NA	NA	NA	NA	NA	NA	NA	NA	Article requested
(Humphreys 2001)	2001	Australia	Groundwater fauna	Milyeringa veritas	1	0	0	0	0	0	0	1	0	0	1	0	0	0	1	NA	NA
(Humphreys 2006)	2006	Australia	Groundwater fauna	Invertebrates, Fishes	NA	0	0	0	0	0	0	1	0	0	0	1	0	0	0	NA	NA
(Humphreys 2008)	2008	Australia	Groundwater fauna	NA	NA	NA	NA	NA	NA	NA	NA	NA	NA	NA	NA	NA	NA	NA	NA	NA	Article requested
(Humphreys 2014)	2014	Christmas Island	Groundwater fauna	Invertebrates, Fishes, Collocalia esculenta natalis	NA	1	NA	1	NA	0	0	1	0	0	1	1	0	0	0	NA	Shrimps, mayflies, copepods and ostracods were found in spring
(Hutchins and Orndorff 2009)	2009	Virginia	Groundwater fauna	Isopoda (Antrolana lira)	1	0	0	0	0	0	0	0	0	0	0	1	0	0	0	NA	NA
(Hutchins 2018)	2018	Texas	Groundwater fauna	Hexapoda, Crustacea, Turbellaria, Mollusca, Arachnida	69	0	0	0	0	0	0	0	0	0	1	1	0	0	0	NA	NA
(Hyde et al. 2018)	2018	Australia	Groundwater fauna	Invertebrates	24	0	0	0	0	0	0	1	0	0	0	1	0	0	0	NA	NA
(Iepure et al. 2016)	2016	Romania	Groundwater fauna	Copepoda, Ostracoda	164	0	0	0	0	0	0	0	0	0	0	1	0	0	0	NA	NA
(Iepure et al. 2017)	2017	Spain	Groundwater fauna	Copepoda, Ostracoda	29	0	0	0	0	0	0	1	0	0	0	1	0	0	0	NA	NA
(Issartel et al. 2010)	2010	France	Groundwater fauna	Calotriton asper	1	0	0	0	0	0	0	1	0	0	0	0	0	0	0	NA	The study focuses on two populations: one epigean and one hypogean
(Jasinska et al. 1996)	1996	NA	Groundwater fauna	NA	NA	NA	NA	NA	NA	NA	NA	NA	NA	NA	NA	NA	NA	NA	NA	NA	Not found
(Jaume 2008)	2008	World	Groundwater fauna	Spelaeogriphacea, Thermosbaenacea	52	1	4	0	0	0	0	1	0	0	0	1	0	0	0	NA	NA
(Javidkar et al. 2018)	2018	Australia	Groundwater fauna	Isopoda	12	0	0	0	0	0	0	0	0	0	0	0	1	0	0	NA	NA
(Javidkar et al. 2016)	2016	Australia	Groundwater fauna	Isopoda	NA	0	0	0	0	0	0	0	0	0	0	0	1	0	0	NA	Isopods identified to family and genus level
(Javidkar et al. 2017)	2017	Australia	Groundwater fauna	Isopoda	12	0	0	0	0	0	0	0	1	0	0	0	1	0	0	NA	NA
(Johns et al. 2015)	2015	England	Groundwater fauna	Crustacea	7	1	6	0	0	1	6	1	0	0	0	1	0	0	0	NA	NA
(Juget and YacoubiKhebiza 1997)	1997	NA	Groundwater fauna	NA	NA	NA	NA	NA	NA	NA	NA	NA	NA	NA	NA	NA	NA	NA	NA	NA	It's in french
(Karanovic and McKay 2010)	2010	Australia	Groundwater fauna	Ostracoda	2	0	0	0	0	0	0	0	1	0	0	0	1	0	0	NA	NA
(Karanovic and Cooper 2011)	2011	Australia	Groundwater fauna	Copepoda	7	0	0	0	0	0	0	0	1	0	0	0	1	0	0	NA	NA
(Karanovic and Cooper 2012)	2012	Australia	Groundwater fauna	Copepoda	21	0	0	0	0	0	0	0	1	0	0	0	1	0	0	NA	NA
(Karanovic et al. 2015)	2015	Australia	Groundwater fauna	Copepoda	4	0	0	0	0	0	0	0	1	0	0	0	0	0	0	NA	NA
(Karanovic et al. 2011)	2011	Australia	Groundwater fauna	Copepoda	43	0	0	0	0	0	0	0	1	0	0	0	1	0	0	NA	NA
(Karanovic et al. 2013)	2013	Australia	Groundwater fauna	Copepoda	30	0	0	0	0	0	0	0	1	0	1	0	1	0	0	NA	NA
(Karanovic and Krajicek 2012)	2012	Australia	Groundwater fauna	Copepoda	7	0	0	0	0	0	0	0	0	0	0	0	1	0	0	NA	NA
(Kaser 2010)	2010	Europe	Groundwater fauna	Invertebrates	NA	0	0	1	NA	0	0	1	0	0	0	0	1	0	0	NA	NA
(Kayo et al. 2012)	2012	Africa, Madagascar	Groundwater fauna	Crustacea	280	NA	NA	0	0	NA	NA	0	0	0	0	1	0	0	0	NA	Data obtained from scientific literatures
(Khebiza et al. 2006)	2006	Italy, Morocco	Groundwater fauna	Anellida, Mollusca, Arthropoda, Nematoda, Platelminta, Tardigrada, Rotatoria	NA	0	0	0	0	0	0	0	0	0	0	1	0	1	0	NA	21 stygobitic species found in two streams (30%)
(Kibichii et al. 2009)	2009	Ireland	Groundwater fauna	NA	NA	NA	NA	NA	NA	NA	NA	NA	NA	NA	NA	NA	NA	NA	NA	NA	Article requested
(Kibichii et al. 2015)	2015	Ireland	Groundwater fauna	Invertebrates	NA	0	0	0	0	0	0	1	0	0	0	0	0	1	0	NA	NA
(King et al. 2012)	2012	Australia	Groundwater fauna	Amphipoda	3	0	0	0	0	0	0	0	1	0	0	0	1	0	0	NA	NA
(Knight and Penk 2010)	2010	Ireland	Groundwater fauna	Invertebrates	NA	1	NA	1	NA	1	NA	0	0	0	0	1	0	0	0	NA	It is easier to sample holy wells instead of springs / Tha majority of invertebrates sampled in springs were of the Niphargus and Gammarus genera
(Konec et al. 2016)	2016	Italy, Slovenia	Groundwater fauna	Isopoda	2	0	0	0	0	0	0	0	1	0	0	0	1	0	0	NA	NA
(Korbel et al. 2017)	2017	Australia	Groundwater fauna	Prokaryotes, Invertebrates, Fungi, Protozoa	NA	0	0	0	0	0	0	0	0	0	0	1	0	0	0	NA	NA
(Korbel et al. 2019)	2019	Australia	Groundwater fauna	Copepoda, Syncarida, Amphipoda	NA	0	0	0	0	0	0	1	0	0	0	0	0	0	0	NA	Influence of sediment size on stygofauna's habitat choice
(Kulkotyluoglu et al. 2017)	2017	Texas	Groundwater fauna	Ostracoda	1	0	0	0	0	0	0	0	1	0	0	0	0	0	0	NA	NA
(Lafont et al. 1996)	1996	France	Groundwater fauna	Oligochaeta	NA	NA	NA	NA	NA	NA	NA	NA	NA	NA	NA	NA	NA	NA	NA	NA	Article requested
(Lafont and Vivier 2006)	2006	France, Switzerland	Groundwater fauna	Oligochaeta	NA	0	0	0	0	0	0	1	0	0	0	1	0	0	0	NA	NA
(Lafont et al. 2006)	2006	France	Groundwater fauna	Oligochaeta	NA	0	0	0	0	0	0	1	0	0	0	0	0	1	0	NA	NA
(Lagnika et al. 2016)	2016	Benin	Groundwater fauna	Nematoda, Planaria, Arthropoda, Oligochaeta	NA	0	0	0	0	0	0	1	0	0	0	1	0	0	0	NA	NA
(Leijs et al. 2011)	2011	Australia	Groundwater fauna	Amphipoda (Bogidiella veneris)	1	0	0	0	0	0	0	0	1	0	0	0	0	0	0	NA	NA
(Lewis et al. 2006)	2006	Oklahoma	Groundwater fauna	Isopoda (Caecidotea)	9	1	2	1	1	1	2	1	1	0	0	0	0	0	0	NA	NA
(Lewis and Reid 2007)	2007	USA	Groundwater fauna	Copepoda	50	NA	NA	NA	NA	NA	NA	0	0	0	0	1	0	0	0	NA	The article doesn't specify which species are stygobites and which are crenobionts / It says that copepods can be found in various habitats including springs
(Little et al. 2016)	2016	Australia	Groundwater fauna	Bathynellacea	NA	0	0	0	0	0	0	0	0	0	0	0	1	0	0	NA	Specimens identified to family level
(Liu et al. 2017)	2017	Slovenia	Groundwater fauna	Copepoda	12	0	0	0	0	0	0	1	0	0	0	1	0	0	0	NA	NA
(Lupkes 1974)	1974	Germany	Groundwater fauna	Arthropoda, Oligochaeta	8	1	6	1	NA	1	6	1	0	0	0	1	0	0	0	NA	Amphipods were found both in subterranean habitats and springs
(MacKay and Williams 2011)	2011	Barbados	Groundwater fauna	Anellida, Gastropoda, Arthropoda	NA	0	0	NA	NA	0	0	1	0	0	0	1	0	0	0	NA	NA
(Mahi et al. 2019)	2019	Algeria	Groundwater fauna	Crustacea, Gastropoda, Oligochaeta	NA	0	0	0	0	0	0	1	0	0	0	1	0	0	0	NA	51 taxa treated
(Maitland 1999)	1999	Scotland	Groundwater fauna	NA	NA	NA	NA	NA	NA	NA	NA	NA	NA	NA	NA	NA	NA	NA	NA	NA	Article requested
(Malard et al. 2009)	2009	Europe	Groundwater fauna	Amphipoda, Cladocera, Ostracoda, Decapoda, Copepoda, Isopoda	373	0	0	1	NA	0	0	1	0	0	0	1	0	0	0	NA	NA
(Malard et al. 2017)	2017	France, Germany	Groundwater fauna	Isopoda (Proasellus walteri)	1	0	0	0	0	0	0	0	0	0	0	0	0	0	0	NA	Genetic differentiation in Proasellus walteri
(Malard et al. 2003a)	2003	Switzerland	Groundwater fauna	Nematoda, Arthropoda	NA	0	0	0	0	0	0	1	0	0	0	1	0	0	0	NA	NA
(Malard et al. 2003b)	2003	Switzerland	Groundwater fauna	Platyhelminthes, Arthropoda, Nematoda	NA	0	0	0	0	0	0	1	0	0	0	1	0	0	0	NA	NA
(Malard et al. 1994)	1994	France	Groundwater fauna	NA	NA	NA	NA	NA	NA	NA	NA	NA	NA	NA	NA	NA	NA	NA	NA	NA	Not found
(Malard et al. 1996)	1996	France	Groundwater fauna	Invertebrates	NA	0	0	1	NA	0	0	0	0	0	0	1	0	1	0	NA	53 taxa collected
(Malard et al. 1997)	1997	NA	Groundwater fauna	NA	NA	NA	NA	NA	NA	NA	NA	NA	NA	NA	NA	NA	NA	NA	NA	NA	Not found
(Mammola and Leroy 2018)	2018	World	Groundwater fauna	NA	0	0	0	0	0	0	0	0	0	0	0	0	0	0	0	NA	"Applying species distribution models to caves and other subterranean habitats" / The article doesn't treat a specific taxa
(Manenti 2014)	2014	Italy	Groundwater fauna	S. salamandra, Nematoda, Mollusca, Hirudinea, Insecta, Triclada, Amphipoda	NA	1	NA	1	NA	1	NA	1	0	0	0	1	0	0	1	NA	11 taxa collected
(Marmonier et al. 2000)	2000	France	Groundwater fauna	Arthropoda, Nematoda, Oligochaeta, Mollusca	NA	0	0	1	NA	0	0	1	0	0	0	1	0	0	0	NA	NA
(Marmonier et al. 2013)	2013	France	Groundwater fauna	Crustacea	4	0	0	0	0	0	0	1	0	0	0	0	0	0	0	NA	NA
(Marmonier et al. 2019)	2019	France	Groundwater fauna	Invertebrates	NA	0	0	0	0	0	0	1	0	0	0	1	0	0	0	NA	Stygobites abundance and richness increase at the upstream portion of the channel
(Marmonier et al. 1993)	1993	NA	Groundwater fauna	NA	NA	NA	NA	NA	NA	NA	NA	NA	NA	NA	NA	NA	NA	NA	NA	NA	Not found
(Martin et al. 2009)	2009	Belgium	Groundwater fauna	Anellida, Crustacea, Mollusca	144	0	0	0	0	0	0	1	0	0	0	1	0	0	0	NA	NA
(Martin et al. 2015)	2015	France	Groundwater fauna	Oligochaeta	40	1	5	1	16	0	0	1	1	0	0	1	0	0	0	NA	Caves were not sampled, just the hyporheic zone
(Martinez-Ansemil et al. 2016)	2016	Europe	Groundwater fauna	Anellida	123	NA	NA	NA	NA	NA	NA	NA	NA	NA	NA	NA	NA	NA	NA	NA	Not found
(Martinez-Ansemil et al. 2002)	2002	Oman	Groundwater fauna	Oligochaeta	NA	NA	NA		NA	NA	NA	NA	NA	NA	NA	NA	NA	NA	NA	NA	Article requested
(Masciopinto et al. 2006)	2006	Italy	Groundwater fauna	Invertebrates	102	NA	NA	NA	NA	NA	NA	1	0	0	0	1	0	0	0	NA	Some specimens were collected from unknown sites / 102 species including sp.
(Mauclaire and Gibert 2001)	2001	NA	Groundwater fauna	NA	NA	NA	NA	NA	NA	NA	NA	NA	NA	NA	NA	NA	NA	NA	NA	NA	Article requested
(Mauclaire et al. 1998)	1998	NA	Groundwater fauna	NA	NA	NA	NA	NA	NA	NA	NA	NA	NA	NA	NA	NA	NA	NA	NA	NA	Not found
(Maurice et al. 2016)	2016	England	Groundwater fauna	Isopoda, Copepoda, Amphipoda	NA	1	1	0	0	0	0	1	0	0	0	0	0	0	0	NA	1 isopod and 6 amphipods species treated / Niphargus aquilex recorded in springs
(Mcinerney et al. 2014)	2014	Europe	Groundwater fauna	Niphargus	78	NA	NA	0	0	NA	NA	0	0	0	0	0	1	0	0	NA	Springs, wells and boreholes were sampled but it is not specified if and how many species were found in each site
(Meland et al. 2015)	2015	World	Groundwater fauna	Mysida, Stygiomysida	1148	NA	NA	NA	NA	NA	NA	0	1	0	0	0	0	0	0	NA	Taxonomic review of the two orders
(Meleg et al. 2015)	2015	Romania	Groundwater fauna	Copepoda	NA	0	0	0	0	0	0	0	0	0	0	1	0	0	0	NA	NA
(Meleg et al. 2012)	2012	Romania	Groundwater fauna	Copepoda	13	0	0	1	5	0	0	1	0	0	0	1	0	0	0	NA	NA
(Meleg et al. 2011)	2011	Romania	Groundwater fauna	Arthropoda, Oligochaeta, Nematoda, Gastropoda	NA	0	0	0	0	0	0	1	0	0	0	1	0	0	0	NA	NA
(Meleg et al. 2014)	2014	Romania	Groundwater fauna	Copepoda	21	0	0	1	NA	0	0	1	0	0	0	1	0	0	0	NA	NA
(Mencio et al. 2014)	2014	Australia	Groundwater fauna	Crustacea, Oligochaeta, Acarina	NA	0	0	NA	NA	0	0	1	0	0	0	1	0	0	0	NA	NA
(Mermillod-Blondin et al. 2000)	2000	France	Groundwater fauna	Crustacea, Oligochaeta, Insecta, Bacteria	NA	0	0	0	0	0	0	1	0	0	0	1	0	0	0	NA	NA
(Mermillod-Blondin et al. 2015)	2015	Switzerland	Groundwater fauna	Arthropoda, Mollusca, Oligochaeta, Nematoda	NA	0	0	0	0	0	0	1	0	0	0	0	0	0	0	NA	NA
(Michel et al. 2009)	2009	Europe	Groundwater fauna	NA	1059	0	0	0	0	0	0	0	0	0	0	0	0	0	0	NA	The article doesn't tell the sampling habitats, just the areas of distribution
(Milanovic 2002)	2002	NA	Groundwater fauna	NA	NA	NA	NA	NA	NA	NA	NA	NA	NA	NA	NA	NA	NA	NA	NA	NA	Article requested
(Mokany et al. 2019)	2019	Australia	Groundwater fauna	NA	NA	0	0	0	0	0	0	0	0	0	0	0	0	0	0	NA	Spatial model to assess diversity of subterranean fauna
(Moldovan et al. 2018)	2018	Romania	Groundwater fauna	Amphipoda, Copepoda	7	0	0	0	0	0	0	1	0	0	0	0	0	0	0	NA	Species collected from dripping water
(Moldovan and Levei 2015)	2015	Romania	Groundwater fauna	Crustacea, Oligochaeta	NA	0	0	NA	NA	0	0	0	0	0	0	0	0	0	0	NA	Importance of sampling frequency and temporal variability of fauna
(Moldovan et al. 2011)	2011	Romania	Groundwater fauna	Rotifera, Tardigrada, Nematoda, Oligochaeta, Arthropoda	NA	0	0	NA	NA	0	0	0	0	0	0	1	0	1	0	NA	NA
(Moldovan et al. 2013)	2013	Romania	Groundwater fauna	Crustacea	NA	0	0	0	0	0	0	0	0	0	0	0	0	1	0	NA	NA
(Moldovan et al. 2012)	2012	Romania	Groundwater fauna	Oligochaeta, Nematoda, Arthropoda	NA	0	0	1	1	0	0	1	0	0	1	0	0	0	0	NA	11 taxa treated
(Mori et al. 2015)	2015	Slovenia	Groundwater fauna	Copepoda, Ostracoda	12	1	7	0	0	0	0	1	0	0	0	0	0	0	0	NA	3 Mixtacandona sp. included
(Moritsch et al. 2014)	2014	Yucatan Peninsula, Australia, Canary Islands, Caribbean	Groundwater fauna	Remipedia, Atyidae (Crustacea)	NA	0	0	0	0	0	0	1	0	0	0	0	0	0	0	NA	NA
(Mosslacher 1998)	1998	Austria	Groundwater fauna	NA	NA	NA	NA	NA	NA	NA	NA	NA	NA	NA	NA	NA	NA	NA	NA	NA	Not available
(Mugnai et al. 2015)	2015	South America, Caribbean, Mexico, Central America	Groundwater fauna	Invertebrates, Bacteria, Archaea, Protozoa, Fungi	NA	0	0	0	0	0	0	1	0	0	1	0	0	1	0	NA	The article talks about the hyporheic zone of Neotropical regions in general
(Murphy et al. 2009)	2009	Australia	Groundwater fauna	Amphipoda	12	1	6	0	0	0	0	0	0	0	0	0	1	0	0	NA	Just springs were sampled / The article says that sequences of six lineages of chiltoniid amphipods (stygobionts) were found / Putative species
(Murphy et al. 2010)	2010	Australia	Groundwater fauna	Ostracoda, Gastropoda, Isopoda, Amphipoda	4	0	0	0	0	0	0	0	0	0	0	0	1	0	0	NA	It seems that the species are tipically from springs
(Nakano and Tomikawa 2018)	2018	Japan	Groundwater fauna	Amphipoda	15	0	0	0	0	0	0	0	1	0	0	0	1	0	0	NA	The study focuses only on Paramoera relicta
(Nakano et al. 2018)	2018	Japan	Groundwater fauna	Amphipoda	3	NA	NA	0	0	NA	NA	0	1	0	0	0	0	0	0	NA	The article talks about nomenclature
(Niemiller et al. 2013)	2013	North America	Groundwater fauna	Amblyopsidae (Fish)	1	0	0	0	0	0	0	0	0	0	1	0	1	0	0	NA	NA
(Nkemegni et al. 2015)	2015	Cameroon	Groundwater fauna	Arthropoda, Gastropoda, Oligochaeta, Nematoda, Tardigrada	NA	0	0	1	NA	0	0	1	0	0	0	1	0	0	0	NA	80 taxa treated
(Notenboom et al. 1995)	1995	Spain	Groundwater fauna	Invertebrates	NA	0	0	NA	NA	0	0	1	0	0	0	1	0	1	0	NA	NA
(Olafsdottir et al. 2019)	2019	Iceland	Groundwater fauna	Invertebrates	NA	0	0	0	0	0	0	1	0	0	0	1	0	0	0	NA	32 taxa treated
(Olsen and Townsend 2003)	2003	New Zealand	Groundwater fauna	Arthropoda, Oligochaeta, Nematoda	NA	0	0	0	0	0	0	1	0	0	0	1	0	0	0	NA	The amphipods found in stream were all blind and unpigmented
(Omesova and Helesic 2010)	2010	Czech Republic	Groundwater fauna	Arthropoda, Oligochaeta, Mollusca, Nematoda	NA	0	0	1	NA	0	0	1	0	0	0	1	0	0	0	NA	NA
(Pacioglu and Moldovan 2016)	2016	England, Ireland	Groundwater fauna	Arthropoda	NA	0	0	0	0	0	0	1	0	0	0	0	0	1	0	NA	NA
(Page et al. 2008)	2008	Australia	Groundwater fauna	Crustacea (Decapoda)	NA	0	0	1	NA	0	0	0	0	0	0	0	1	0	0	NA	7 sp. / Evolutionary relationships between Stygiocaris and Typhlatya
(Pandourski and Bobic 2008)	2008	NA	Groundwater fauna	NA	NA	NA	NA	NA	NA	NA	NA	NA	NA	NA	NA	NA	NA	NA	NA	NA	Article requested
(Peralta 2014)	2014	South America	Groundwater fauna	Anaspidacea	1	0	0	0	0	0	0	0	1	0	0	0	0	0	0	NA	NA
(Perina et al. 2018)	2018	Australia	Groundwater fauna	Bathynellidae	5	0	0	0	0	0	0	0	1	0	0	0	1	0	0	NA	NA
(Perina et al. 2019b)	2019	Australia	Groundwater fauna	Bathynellidae	NA	0	0	0	0	0	0	0	1	0	0	0	1	0	0	NA	NA
(Perina et al. 2019a)	2019	Australia	Groundwater fauna	Bathynellidae	NA	0	0	0	0	0	0	0	1	0	0	0	1	0	0	NA	NA
(Pesce 1985)	1985	Italy	Groundwater fauna	NA	NA	NA	NA	NA	NA	NA	NA	NA	NA	NA	NA	NA	NA	NA	NA	NA	Not found
(Peterson et al. 2006)	2006	USA	Groundwater fauna	Folsomia candida (Collembola)	NA	NA	NA	NA	NA	NA	NA	NA	NA	NA	NA	NA	NA	NA	NA	NA	Article requested
(Petts and Bickerton 1994)	1994	Switzerland	Groundwater fauna	NA	NA	NA	NA	NA	NA	NA	NA	NA	NA	NA	NA	NA	NA	NA	NA	NA	Article requested
(Pfister et al. 2013)	2013	Germany	Groundwater fauna	Amphipoda	NA	0	0	0	0	0	0	0	0	0	0	0	0	0	0	NA	More than 95% of the amphipods collected were Niphargus inopinatus, occasionally accompanied by N. bajuvaricus / Detection of catecholamines
(Pinder et al. 2006)	2006	Australia	Groundwater fauna	Tubificidae	4	0	0	0	0	0	0	0	1	0	0	0	0	0	0	NA	NA
(Pipan et al. 2012)	2012	USA	Groundwater fauna	Amphipoda, Isopoda, Gastropoda	15	1	7	0	0	0	0	1	0	0	0	1	0	0	0	NA	Two of the 7 species of stygobites found in springs are weakly troglomorphic / 5 out of 7 species are hypotelminorheic specialists
(Plenet et al. 1995)	1995	NA	Groundwater fauna	NA	NA	NA	NA	NA	NA	NA	NA	NA	NA	NA	NA	NA	NA	NA	NA	NA	Article requested
(Plenet et al. 1996)	1996	NA	Groundwater fauna	NA	NA	NA	NA	NA	NA	NA	NA	NA	NA	NA	NA	NA	NA	NA	NA	NA	Not available
(Por 2007)	2007	Israel	Groundwater fauna	Arthropoda, Bacteria, Protozoa	NA	1	NA	0	0	NA	NA	1	0	0	0	1	0	0	0	Feeding on films of sulfur bacteria	NA
(Pospisil and Danielopol 2000)	2000	NA	Groundwater fauna	NA	23	NA	NA	NA	NA	NA	NA	NA	NA	NA	NA	NA	NA	NA	NA	NA	Article requested
(Rabelo et al. 2018)	2018	Brazil	Groundwater fauna	Invertebrates	1475	0	0	NA	NA	0	0	1	0	0	0	1	0	0	0	NA	NA
(Rasines-Ladero and Iepure 2016)	2016	Spain	Groundwater fauna	Ostracoda, Cyclopoida	NA	0	0	NA	NA	0	0	1	0	0	0	1	0	0	0	NA	NA
(Reboleira et al. 2013)	2013	Portugal	Groundwater fauna	Proasellus	2	0	0	0	0	0	0	1	0	0	0	0	0	1	1	Feeding on organic matter	NA
(Reboleira et al. 2011)	2011	Portugal	Groundwater fauna	Arthropoda, Oligochaeta	110	0	0	0	0	0	0	0	0	0	1	1	0	0	0	NA	NA
(Reddy 2018)	2018	India	Groundwater fauna	Crustacea	NA	NA	NA	NA	NA	NA	NA	NA	NA	NA	NA	NA	NA	NA	NA	NA	Article requested
(Reddy et al. 2016)	2016	India	Groundwater fauna	Parastenocarididae	3	0	0	0	0	0	0	0	1	0	0	0	1	0	0	NA	NA
(Reeves et al. 2007)	2007	Australia	Groundwater fauna	Ostracoda	111	0	0	0	0	0	0	0	0	0	0	1	0	0	0	NA	The article says that stygophilic species can be found in springs
(Ribera and Reboleira 2019)	2019	Portugal	Groundwater fauna	Dytiscidae	47	0	0	0	0	0	0	0	1	0	0	0	1	0	0	NA	NA
(Ring 1991)	1991	British-Columbia	Groundwater fauna	Arthropoda	NA	NA	NA	0	0	0	0	1	0	0	0	1	0	0	0	NA	The article says that it may be difficult to access informations about springs because they are not consistent habitats / It is just cited that stygobionts can be found in springs
(Rios-Escalante et al. 2016)	2016	Chile	Groundwater fauna	Crustacea	46	NA	NA	0	0	NA	NA	0	0	0	0	0	0	0	0	NA	Checklist of subterranean crustaceans
(Robertson et al. 2009)	2009	Great Britain	Groundwater fauna	Invertebrates	NA	NA	NA	0	0	NA	NA	1	0	0	0	1	0	1	0	NA	NA
(Rodriguez and Achurra 2010)	2010	Spain	Groundwater fauna	Oligochaeta	3	1	2	0	0	1	1	1	1	0	0	0	0	0	0	NA	NA
(Rogulj et al. 1994)	1994	NA	Groundwater fauna	NA	NA	NA	NA	NA	NA	NA	NA	NA	NA	NA	NA	NA	NA	NA	NA	NA	Article requested
(Rossetti et al. 2005)	2005	Italy	Groundwater fauna	Ostracoda	12	NA	NA	0	0	0	0	1	0	0	1	1	0	0	0	NA	The article doesn't specify if the species are stygobites
(Rouch and Danielopol 1997)	1997	Austria	Groundwater fauna	Crustacea	NA	NA	NA	NA	NA	NA	NA	NA	NA	NA	NA	NA	NA	NA	NA	NA	Not found
(Rouch et al. 1997)	1997	Europe	Groundwater fauna	NA	NA	NA	NA	NA	NA	NA	NA	NA	NA	NA	NA	NA	NA	NA	NA	NA	Not found
(Ruffo and Vonk 2001)	2001	Slovenia	Groundwater fauna	Ingolfiella beatricis (Amphipoda)	1	0	0	0	0	0	0	0	1	0	0	0	0	0	0	NA	NA
(Rundle et al. 2000)	2000	World	Groundwater fauna	Copepoda, Cladocera	NA	NA	NA	0	0	NA	NA	1	0	0	0	1	0	0	0	NA	NA
(Sacco et al. 2019)	2019	NA	Groundwater fauna	NA	NA	NA	NA	NA	NA	NA	NA	NA	NA	NA	NA	NA	NA	NA	NA	NA	Not found
(Sarkka et al. 1998)	1998	Finland	Groundwater fauna	Copepoda	NA	NA	NA	0	0	NA	NA	1	0	0	0	1	0	0	0	NA	It is not specified if the copepods are stygobites
(Sarkka and Makela 1999)	1999	Finland	Groundwater fauna	Invertebrates	NA	0	0	0	0	0	0	1	0	0	0	1	0	0	0	NA	NA
(Scarsbrook and Fenwick 2003)	2003	New Zealand	Groundwater fauna	Crustacea	NA	0	0	0	0	0	0	1	0	0	0	1	0	0	0	NA	NA
(Scarsbrook and Halliday 2002)	2002	New Zealand	Groundwater fauna	Invertebrates	NA	0	0	0	0	0	0	0	0	0	0	1	0	0	0	NA	61 taxa collected / About sampling methods
(Schenkova et al. 2010)	2010	Czech Republic	Groundwater fauna	Oligochaeta	95	0	0	0	0	0	0	1	1	0	0	1	0	0	0	NA	NA
(Schmidt and Hahn 2012)	2012	NA	Groundwater fauna	NA	0	0	0	0	0	0	0	1	0	0	0	0	0	0	0	NA	The article says that stygobites are expected to dominate only in aquifer without inputs from the surface
(Schmidt et al. 2007a)	2007	Australia	Groundwater fauna	Invertebrates	NA	NA	NA	NA	NA	0	0	1	0	0	0	1	0	0	0	NA	Some wells were drilled near springs / It is not specified if the species treated are stygobites
(Schmidt et al. 2004)	2004	Australia	Groundwater fauna	Invertebrates	NA	0	0	0	0	0	0	1	0	0	0	1	0	0	0	NA	About sampling methods
(Schmidt et al. 2007b)	2007	Australia	Groundwater fauna	Invertebrates	NA	0	0	0	0	0	0	1	0	0	0	1	0	0	0	NA	65 taxa sampled
(Schminke 2008)	2008	Papua New Guinea	Groundwater fauna	Copepoda	16	0	0	0	0	0	0	1	1	0	0	0	0	0	0	NA	NA
(Schon et al. 2010)	2010	Australia	Groundwater fauna	Ostracoda	2	NA	NA	0	0	NA	NA	0	0	0	0	0	1	0	0	NA	"89 samples from 100 habitats above ground were collected"
(Shaik and Reddy 2018)	2018	India	Groundwater fauna	Bathynellacea	NA	NA	NA	NA	NA	NA	NA	NA	NA	NA	NA	NA	NA	NA	NA	NA	Not found
(Shapouri et al. 2016)	2016	Portugal	Groundwater fauna	Arthropoda, Mollusca, Anellida, Nematoda, Cnidaria	NA	0	0	NA	NA	0	0	1	0	0	0	0	0	0	0	NA	51 taxa sampled
(Sidorov and Gontcharov 2013)	2013	Russia	Groundwater fauna	Amphipoda	3	1	1	0	0	0	0	0	1	0	0	0	1	0	0	NA	I can see only the first page of the article
(Smith and Wood 2002)	2002	NA	Groundwater fauna	NA	NA	NA	NA	NA	NA	NA	NA	NA	NA	NA	NA	NA	NA	NA	NA	NA	Article requested
(Sorensen et al. 2013)	2013	United Kingdom	Groundwater fauna	Invertebrates, Bacteria	NA	0	0	0	0	0	0	1	0	0	0	1	0	0	0	NA	NA
(Stein et al. 2012)	2012	World	Groundwater fauna	Crustacea, Nematoda, Oligochaeta, Mollusca, Acarina	7000	0	0	0	0	0	0	1	0	0	0	1	0	0	0	NA	Bioregional classification of groundwater systems
(Stein et al. 2010)	2010	Germany	Groundwater fauna	Crustacea, Oligochaeta, Acarina, Nematoda, Turbellaria, Bacteria	NA	0	0	0	0	0	0	1	0	0	0	1	0	0	0	NA	22 species plus 5 higher taxa treated
(Stocchino et al. 2017)	2017	Romania	Groundwater fauna	Platyhelminthes (Dendrocoelidae)	19	NA	NA	0	0	NA	NA	1	1	0	0	1	0	0	0	NA	It is not specified if the species are stygobites / 3 species were found only in springs, 1 can be found both in caves and springs
(Stoch and Galassi 2010)	2010	World	Groundwater fauna	Invertebrates	110 719	0	0	0	0	0	0	1	0	0	0	1	0	0	0	NA	NA
(Stock 1994)	1994	Antilles, Bahamas, Bermuda, Ascension, Cape Verde, Canary Islands, Madeira	Groundwater fauna	Invertebrates	NA	0	0	0	0	0	0	1	0	0	0	0	0	0	0	NA	Biogeographic synthesis of insular groundwater fauna
(Strayer et al. 1995)	1995	America	Groundwater fauna	Crustacea, Anellida	NA	1	NA	0	0	0	0	1	0	0	0	1	0	0	0	NA	Bathynellacea, Crangonyctidae and the Troglochaetus genera were found in springs
(Stumpp and Hose 2013)	2013	Australia	Groundwater fauna	Copepoda, Parabathynellidae	NA	0	0	0	0	0	0	0	0	1	0	0	0	0	0	NA	NA
(Tang and Knott 2009)	2009	New Zealand	Groundwater fauna	Harpacticoida, Cyclopoida	15	1	3	1	1	1	3	0	1	0	0	0	0	0	0	NA	NA
(Tockner et al. 1997)	1997	Switzerland	Groundwater fauna	NA	NA	NA	NA	NA	NA	NA	NA	NA	NA	NA	NA	NA	NA	NA	NA	NA	I can only see the first page
(Tomikawa and Nakano 2018)	2018	Japan	Groundwater fauna	Amphipoda	2	0	0	0	0	0	0	1	1	0	0	0	0	0	0	NA	NA
(Vanderkamp 1995)	1995	NA	Groundwater fauna	NA	NA	NA	NA	NA	NA	NA	NA	NA	NA	NA	NA	NA	NA	NA	NA	NA	Not found
(Victor and Al-Farsi 2001)	2001	Oman	Groundwater fauna	Invertebrates	33	0	0	1	NA	0	0	1	0	0	0	1	0	0	0	NA	It is not specified if some species are stygobites
(Villemant et al. 2015)	2015	France, Italy	Groundwater fauna	Invertebrates	NA	NA	NA	NA	NA	NA	NA	1	0	0	0	1	0	0	0	NA	965 taxa treated / Sampling habitats not specified
(von Fumetti et al. 2017)	2017	Switzerland	Groundwater fauna	Invertebrates	NA	NA	NA	0	0	NA	NA	1	0	0	0	1	0	0	0	NA	71 species plus higher taxa treated / It is not specified if some species are stygobites
(Voros et al. 2017)	2017	Croatia	Groundwater fauna	Proteus anguinus	1	1	1	0	0	1	1	0	0	0	0	0	0	0	0	NA	Detection of Proteus anguinus using environmental DNA
(Wagner 2012)	2012	Israel	Groundwater fauna	Thermosbaenacea	NA	NA	NA	NA	NA	NA	NA	NA	NA	NA	NA	NA	NA	NA	NA	NA	Article requested
(Ward 1994)	1994	NA	Groundwater fauna	NA	NA	NA	NA	NA	NA	NA	NA	NA	NA	NA	NA	NA	NA	NA	NA	NA	Article requested
(Ward et al. 1998)	1998	NA	Groundwater fauna	Eumetazoa	NA	0	0	1	NA	0	0	1	0	1	0	1	0	0	1	NA	"Some epigean animals of running waters are preadapted for subsurface life"
(Watts and Humphreys 2009)	2009	Australia	Groundwater fauna	Dytiscidae	14	NA	NA	NA	NA	NA	NA	NA	NA	NA	NA	NA	NA	NA	NA	NA	Article requested
(White et al. 2018)	2018	United Kingdom	Groundwater fauna	Invertebrates	NA	0	0	0	0	0	0	1	0	0	0	1	0	0	0	NA	NA
(Williams 2003)	2003	Wales	Groundwater fauna	Mollusca, Turbellaria, Nematoda, Oligochaeta, Arthropoda	NA	0	0	0	0	0	0	1	0	0	0	1	0	0	0	NA	NA
(Williams et al. 1997)	1997	Canada	Groundwater fauna	NA	NA	NA	NA	NA	NA	NA	NA	NA	NA	NA	NA	NA	NA	NA	NA	NA	For private use only
(Wilson 2008)	2008	India, New Zealand, Australia, Africa	Groundwater fauna	Isopoda	61	NA	NA	NA	NA	NA	NA	0	1	0	0	0	1	0	0	NA	No sampling habitats / "‘Hypogean’ refers to taxa found in deep groundwater in bores or wells, in cave streams and pools, or in openings to springs"
(Wood and Armitage 2004)	2004	England	Groundwater fauna	Invertebrates	NA	0	0	0	0	0	0	NA	NA	NA	NA	1	NA	NA	NA	NA	87 taxa treated
(Wood et al. 2002)	2002	England	Groundwater fauna	Copepoda, Amphipoda, Anellida, Insecta, Bivalvia	NA	0	0	1	NA	0	0	0	0	0	0	0	0	1	0	NA	31 taxa collected
(Wood et al. 2008)	2008	England	Groundwater fauna	Invertebrates	NA	0	0	1	NA	0	0	0	0	0	0	0	0	1	0	NA	34 taxa collected
(Wood et al. 2005)	2005	England	Groundwater fauna	Invertebrates	NA	0	0	0	0	0	0	1	0	0	0	1	0	0	0	NA	60 taxa collected
(Yacoubi-Khebiza et al. 1999)	1999	Morocco	Groundwater fauna	Crustacea	NA	NA	NA	NA	NA	NA	NA	1	0	0	0	1	0	0	0	NA	Article requested
(Yao et al. 2017)	2017	France	Groundwater fauna	Invertebrates, Bacteria	NA	0	0	0	0	0	0	1	0	0	0	1	0	0	0	NA	NA
(Zagmajster et al. 2010)	2010	Balkan Peninsula	Groundwater fauna	Coleoptera	371	0	0	0	0	0	0	1	0	0	0	0	0	0	0	NA	The article talks about stygofauna sampling methods and says that stygobites are often difficult to collect
(Zaksek et al. 2009)	2009	Slovenia, italy, Croatia, Bosnia and Herzegovina	Groundwater fauna	Troglocaris anophthalmus	1	1	1	0	0	1	0	0	0	0	0	0	1	0	0	NA	NA
(Abramova et al. 2017)	2017	Russia	Spring fauna freshwater	Rotifera, Arthropoda	125	0	0	0	0	0	0	1	0	0	0	1	0	0	0	NA	NA
(Albrecht et al. 2009)	2009	Greece	Spring fauna freshwater	Mollusca	NA	NA	NA	NA	NA	NA	NA	NA	NA	NA	NA	NA	NA	NA	NA	NA	Article requested
(Alkalaj et al. 2019)	2019	Iceland	Spring fauna freshwater	Ostracoda	16	NA	NA	NA	NA	NA	NA	1	1	0	0	0	0	0	0	NA	It is not specified if some species are stygobites
(Baars et al. 2014)	2014	Ireland	Spring fauna freshwater	Invertebrates	NA	0	0	0	0	0	0	1	0	0	0	1	0	0	0	NA	202 taxa treated
(Barquin and Death 2004)	2004	Spain	Spring fauna freshwater	Invertebrates	NA	NA	NA	NA	NA	NA	NA	1	0	0	0	1	0	0	1	Collectors, filterers, predators, scrapers, shredders, gatherers	90 taxa treated / It is not specified if some species are stygobites
(Barquin and Death 2011)	2011	New Zealand	Spring fauna freshwater	Invertebrates	NA	NA	NA	NA	NA	NA	NA	1	0	0	0	1	0	0	1	Filterers, predators, shredders	It is not specified if some species are stygobites
(Bergersen 1995)	1995	Greenland	Spring fauna freshwater	Invertebrates	100	0	0	0	0	0	0	0	0	0	0	1	0	0	0	NA	NA
(Bogan et al. 2014)	2014	Mexico	Spring fauna freshwater	Invertebrates, Fishes, Amphibia, Reptilia	NA	0	0	0	0	0	0	1	0	0	1	1	0	0	0	NA	210 taxa of invertebrates
(Boix et al. 2007)	2007	Iberian Peninsula	Spring fauna freshwater	Crustacea, Insecta	NA	NA	NA	NA	NA	NA	NA	1	0	0	0	1	0	0	0	NA	420 taxa treated / It is not specified if some species are stygobites
(Brancelj and Karanovic 2015)	2015	Slovenia, Italy, Japan	Spring fauna freshwater	Maraenobiotus (Copepoda)	4	1	1	0	0	NA	NA	1	1	0	0	0	0	0	0	NA	Harpacticoida occur in springs only accidentally, as a drift from epikarst
(Brim-Box et al. 2014)	2014	Australia	Spring fauna freshwater	Invertebrates	NA	NA	NA	0	0	NA	NA	1	0	0	0	1	0	0	0	NA	118 taxonomic entities found / It is not specified if some species are stygobites
(Callanan et al. 2008)	2008	Ireland	Spring fauna freshwater	Invertebrates	NA	0	0	0	0	0	0	1	0	0	0	0	0	1	0	NA	141 recorderd in spring, 127 in summer
(Castro et al. 2007)	2007	Portugal	Spring fauna freshwater	Cladocera, Copepoda, Chaoborus	NA	0	0	0	0	0	0	1	0	0	0	0	0	0	0	NA	NA
(Colgan and Ponder 1994)	1994	Australia	Spring fauna freshwater	Hydrobiidae	NA	0	0	0	0	0	0	0	0	0	0	0	1	0	0	NA	Freshwater snails
(Collado and Mendez 2013)	2013	Chile	Spring fauna freshwater	Gastropoda	4	0	0	0	0	0	0	0	0	0	0	0	1	0	0	NA	NA
(Collier and Smith 2006)	2006	New Zealand	Spring fauna freshwater	Invertebrates	NA	NA	NA	NA	NA	NA	NA	1	0	0	0	1	0	0	0	NA	147 taxa found / It is not specified if some species are stygobites
(Copilas-Ciocianu et al. 2014)	2014	Romania	Spring fauna freshwater	Amphipoda	11	0	0	1	3	0	0	0	1	0	0	0	0	0	0	NA	NA
(Coulson et al. 2014)	2014	Svalbard, Franz Josef Land, Novaya Zemlya	Spring fauna freshwater	Invertebrates	NA	0	0	0	0	0	0	1	0	0	0	1	0	0	0	NA	NA
(Denisenko et al. 2019)	2019	Russia	Spring fauna freshwater	Crustacea, Cnidaria, Annelida, Bryozoa, Mollusca	NA	0	0	0	0	0	0	1	0	0	0	1	0	0	0	NA	104 taxa found
(Di Sabatino et al. 2003)	2003	Italy	Spring fauna freshwater	Hydrachnidia	163	0	0	0	0	0	0	1	0	0	0	1	0	0	0	NA	Crenobionts, crenophiles and crenoxenes
(Di Sabatino et al. 2000)	2000	World	Spring fauna freshwater	Hydrachnidia	5000	NA	NA	0	0	NA	NA	1	1	1	0	0	0	0	1	Predators (feeding on insect-larvae, insect-eggs, microcrustacea) or parasitics	NA
(Di Sabatino et al. 2008)	2008	World	Spring fauna freshwater	Hydrachnidia	6000	NA	NA	0	0	NA	NA	1	1	0	0	1	1	0	0	NA	NA
(Evtimova and Pandourski 2016)	2016	Iceland	Spring fauna freshwater	Rotifera, Crustacea, Gastropoda, Nematoda, Acari, Annelida, Hexapoda, Tardigrada	NA	NA	NA	0	0	NA	NA	1	0	0	0	1	0	0	0	NA	39 taxa / It is not specified if some species are stygobites
(Fjellheim and Raddum 2001)	2001	Norway	Spring fauna freshwater	Invertebrates	NA	0	0	0	0	0	0	1	0	0	0	1	0	1	0	NA	NA
(Friberg et al. 1998)	1998	Denmark	Spring fauna freshwater	Invertebrates	NA	0	0	0	0	0	0	1	0	0	0	1	0	1	0	NA	NA
(Fureder 2007)	2007	Australia, Europe	Spring fauna freshwater	Invertebrates	NA	0	0	0	0	0	0	1	0	0	0	1	0	0	0	NA	297 taxa identified
(Gribsholt et al. 2007)	2007	Belgium	Spring fauna freshwater	Invertebrates	NA	NA	NA	0	0	NA	NA	1	0	0	0	0	0	0	0	NA	It is not specified if some of the species found are stygobites
(Gunn et al. 2000)	2000	England	Spring fauna freshwater	Planariidae, Mollusca, Oligochaeta, Arthropoda	NA	1	NA	0	0	1	NA	1	0	0	1	1	0	0	0	Organic matter transported by water	"The majority of taxa recorded within the caves were also found at the surface either in the sinking streams or in the springs" / Between the 28 taxa recorded in caves only 8 were not found in springs or stream sinks
(Gurlek 2019)	2019	Turkey	Spring fauna freshwater	Gastropoda, Bivalvia	28	0	0	0	0	0	0	0	1	0	0	0	0	0	0	NA	NA
(Humphreys 2014)	2014	Christmas Island	Spring fauna freshwater	Invertebrates, Fishes	NA	1	NA	0	0	1	NA	1	0	0	0	1	0	0	0	NA	NA
(Ilmonen et al. 2009)	2009	Finland	Spring fauna freshwater	NA	NA	NA	NA	NA	NA	NA	NA	NA	NA	NA	NA	NA	NA	NA	NA	NA	Article requested
(Jaume 2008)	2008	World	Spring fauna freshwater	Spelaeogriphacea, Thermosbaenacea	22	NA	NA	0	0	0	0	1	0	0	0	1	0	0	0	NA	It is not specified if some of the species found in thermo-mineral springs are stygobites
(Johnson et al. 2013)	2013	Canada, USA	Spring fauna freshwater	Gastropoda	703	0	0	0	0	0	0	1	0	0	0	1	0	0	0	NA	NA
(Kapakos and Karaouzas 2019)	2019	Greece	Spring fauna freshwater	Decapoda	6	0	0	0	0	0	0	1	0	0	0	0	0	0	0	NA	NA
(Khatami and Shayegan 2006)	2006	Iran	Spring fauna freshwater	Invertebrates	NA	NA	NA	0	0	0	0	1	0	0	0	1	0	0	0	NA	58 taxa treated / It is not specified if some of the species treated are stygobites
(Konopacka et al. 2014)	2014	Moldova	Spring fauna freshwater	Amphipoda	18	1	3	1	2	0	0	1	0	0	0	1	0	0	0	NA	Niphargus found in springs and wells / Gammarus found in springs and wells
(Kulkoyluoglu 2004)	2004	Turkey	Spring fauna freshwater	Ostracoda	18	NA	NA	0	0	0	0	1	0	0	0	0	0	0	0	NA	It is not specified if some of the species are stygobites
(Kulkoyluoglu 2009)	2009	Turkey	Spring fauna freshwater	Ostracoda	6	0	0	0	0	0	0	1	0	0	0	0	0	0	0	NA	NA
(Kulkoyluoglu et al. 2007)	2007	Turkey	Spring fauna freshwater	Ostracoda	13	0	0	0	0	0	0	1	0	0	0	0	0	1	0	NA	NA
(Kulkoyluoglu and Vinyard 2000)	2000	Nevada, Idaho, Oregon	Spring fauna freshwater	Ostracoda	14	0	0	0	0	0	0	1	1	0	0	0	0	0	0	NA	NA
(Lorenschat and Schwalb 2013)	2013	NA	Spring fauna freshwater	NA	NA	NA	NA	NA	NA	NA	NA	NA	NA	NA	NA	NA	NA	NA	NA	NA	Article requested
(Manenti 2014)	2014	Italy	Spring fauna freshwater	Amphipoda, Triclada, Insecta, Mollusca, Hirudinea, Nematomorpha, S. salamandra	NA	1	NA	1	NA	1	NA	1	0	0	0	0	0	0	0	NA	11 taxa found / Chironomids and trichopterans were found inside caves / "Several Niphargus species can be found in epigeous habitats"
(Martin 2006)	2006	Luxembourg	Spring fauna freshwater	Hydrachnidia	37	NA	NA	NA	NA	NA	NA	NA	NA	NA	NA	NA	NA	NA	NA	NA	Article requested
(Martin et al. 2015)	2015	France	Spring fauna freshwater	Oligochaeta	40	1	4	NA	NA	0	0	1	1	0	0	1	0	0	0	NA	2 stygobiont species were found both in springs and hyporheic zone
(Morales et al. 2010)	2010	Texas	Spring fauna freshwater	Copepoda	38	0	0	0	0	0	0	1	0	0	0	1	0	0	0	NA	NA
(Mori and Brancelj 2006)	2006	Slovenia	Spring fauna freshwater	Invertebrates	NA	1	NA	0	0	0	0	1	0	0	0	1	0	0	0	NA	From 8 to 26 taxa collected in each spring / 70 taxa collected from 16 springs / "At low altitudes, stygobionts are a common component of spring fauna" / Iglica hauffeni, Niphargus spp. and Proasellus deminutus were found in springs
(Murphy et al. 2009)	2009	Australia	Spring fauna freshwater	Amphipoda	12	NA	NA	0	0	0	0	0	0	0	0	0	1	0	0	NA	It is not specified if some of the species are stygobites
(Novichkova et al. 2014)	2014	Iceland	Spring fauna freshwater	Cladocera, Copepoda	28	NA	NA	0	0	0	0	1	1	0	0	1	0	0	0	NA	It is not specified if some of the species are stygobites or if they were collected in springs
(Percin-Pacal et al. 2017)	2017	Turkey	Spring fauna freshwater	Ostracoda	18	0	0	0	0	0	0	1	0	0	0	1	0	0	0	NA	NA
(Pieri et al. 2007)	2007	Italy	Spring fauna freshwater	Ostracoda	16	0	0	0	0	0	0	1	0	0	0	1	0	0	0	NA	NA
(Polaskova et al. 2017)	2017	Czech Republic	Spring fauna freshwater	Invertebrates	NA	NA	NA	0	0	0	0	1	0	0	0	1	0	0	0	NA	Some species were spring specialists but others were not
(Perez et al. 2005)	2005	Australia	Spring fauna freshwater	Hydrobiidae	NA	NA	NA	0	0	0	0	0	0	0	0	0	1	0	0	NA	11 taxa collected
(Pozojevic et al. 2018)	2018	Croatia	Spring fauna freshwater	Hydrachnidia	NA	0	0	0	0	0	0	1	0	0	0	1	0	0	0	NA	NA
(Prejs 1993)	1993	Norway	Spring fauna freshwater	NA	NA	NA	NA	NA	NA	NA	NA	NA	NA	NA	NA	NA	NA	NA	NA	NA	Article requested
(Reiss et al. 2016)	2016	Germany, Switzerland	Spring fauna freshwater	Invertebrates	NA	0	0	0	0	0	0	1	0	0	0	1	0	0	0	NA	NA
(Richards et al. 2014)	2014	North America	Spring fauna freshwater	Gastropoda	3	0	0	0	0	0	0	1	0	0	0	0	0	0	0	NA	NA
(Robson and Clay 2005)	2005	Australia	Spring fauna freshwater	Invertebrates	NA	0	0	0	0	0	0	1	0	0	0	1	0	0	0	NA	NA
(Rossetti et al. 2004)	2004	Italy	Spring fauna freshwater	Ostracoda	19	0	0	0	0	0	0	1	0	0	0	1	0	0	0	NA	NA
(Rossetti et al. 2005)	2005	Italy	Spring fauna freshwater	Ostracoda	12	0	0	0	0	0	0	1	0	0	0	1	0	0	0	NA	NA
(Sari and Kulkoyluoglu 2010)	2010	Turkey	Spring fauna freshwater	Ostracoda	41	0	0	0	0	0	0	1	0	0	0	1	0	0	0	NA	NA
(Savatenalinton and Suttajit 2016)	2016	Thailand	Spring fauna freshwater	Ostracoda	67	NA	NA	NA	NA	NA	NA	NA	NA	NA	NA	NA	NA	NA	NA	NA	There is another article instead of this one
(Schmidlin et al. 2015a)	2015	Europe	Spring fauna freshwater	Gammarus fossarum	NA	NA	NA	NA	NA	NA	NA	NA	NA	NA	NA	NA	NA	NA	NA	NA	For private use only
(Schmidlin et al. 2015b)	2015	NA	Spring fauna freshwater	Gammarus fossarum	NA	NA	NA	NA	NA	NA	NA	NA	NA	NA	NA	NA	NA	NA	NA	NA	For private use only
(Sirbu and Benedek 2017)	2017	Romania	Spring fauna freshwater	Gastropoda	NA	0	0	0	0	0	0	1	0	0	0	1	0	0	0	NA	NA
(Spyra 2017)	2017	Poland	Spring fauna freshwater	Gastropoda	22	0	0	0	0	0	0	1	0	0	0	0	0	0	0	NA	NA
(Strachan et al. 2016)	2016	Australia	Spring fauna freshwater	Invertebrates	NA	0	0	0	0	0	0	1	0	0	0	1	0	0	0	NA	NA
(Strong et al. 2008)	2008	World	Spring fauna freshwater	Gastropoda	4000	NA	NA	0	0	NA	NA	1	0	0	0	1	0	0	0	NA	Spring and headwater habitats are dominated by hydrobioids / Over 300 stygobiont species documented worldwide
(Suarez-Morales et al. 2010)	2010	Mexico	Spring fauna freshwater	Copepoda	5	0	0	0	0	0	0	1	1	0	0	0	0	0	0	NA	NA
(Tang and Knott 2009)	2009	Australia	Spring fauna freshwater	Copepoda	NA	NA	NA	NA	NA	NA	NA	NA	NA	NA	NA	NA	NA	NA	NA	NA	For private use only
(Ucak et al. 2014)	2014	Turkey	Spring fauna freshwater	Ostracoda	31	0	0	0	0	0	0	1	0	0	0	1	0	0	0	NA	NA
(Von Fumetti and Nagel 2011)	2011	Switzerland	Spring fauna freshwater	Invertebrates	NA	NA	NA	0	0	0	0	1	0	0	0	0	0	0	0	Scrapers, filtering collectors, gathering collectors, shredders	It is not specified if some of the species are stygobites
(von Fumetti et al. 2007)	2007	NA	Spring fauna freshwater	NA	NA	NA	NA	NA	NA	NA	NA	NA	NA	NA	NA	NA	NA	NA	NA	NA	Not found
(Von Fumetti et al. 2006)	2006	Switzerland	Spring fauna freshwater	Invertebrates	NA	0	0	0	0	0	0	1	0	0	0	1	0	0	0	NA	82 species and higher taxa found
(Witt et al. 2003)	2003	Arizona, Nevada	Spring fauna freshwater	Amphipoda	7	0	0	0	0	0	0	1	0	0	0	0	1	0	0	NA	NA
(Worsham et al. 2016)	2016	Texas	Spring fauna freshwater	Anellida, Turbellaria, Nemertea	NA	1	1	0	0	0	0	1	1	0	0	1	0	0	0	NA	Haplotaxis cf. Gordioides found in spring
(Yilmaz and Kulkoyluoglu 2006)	2009	Turkey	Spring fauna freshwater	Ostracoda	NA	0	0	0	0	0	0	1	0	0	0	0	0	0	0	NA	9 taxa recorded
(Zganec et al. 2016)	2016	Balkan Peninsula	Spring fauna freshwater	Echinogammarus acarinatus, Fontogammarus dalmatinus (Amphipoda)	2	0	0	0	0	0	0	1	0	0	1	0	0	0	0	NA	NA
SUM	NA	NA	NA	NA	45735	57	138	37	46	33	57	196	76	4	24	177	62	24	11	NA	NA
